# Supplementary material for: Chemical ordering-driven modulation of plasmonic hot carriers in Janus nanostructures
Source: Royal Society of Chemistry journal article supplement (doi:10.1039/d5cp02576a), 2025-01-01
Supplement: d5cp02576a1.pdf [file d5cp02576a1.pdf]

## **Supporting Information**

### **Chemical Ordering–Driven Modulation of Plasmonic Hot Carriers in Janus Nanostructures**

Junais Habeeb Mokkaath

[junais.mokkaath@asu.edu.kw](mailto:junais.mokkaath@asu.edu.kw)

College of Integrative Studies, Abdullah Al Salem University (ASU), Block 3, Khaldiya, Kuwait

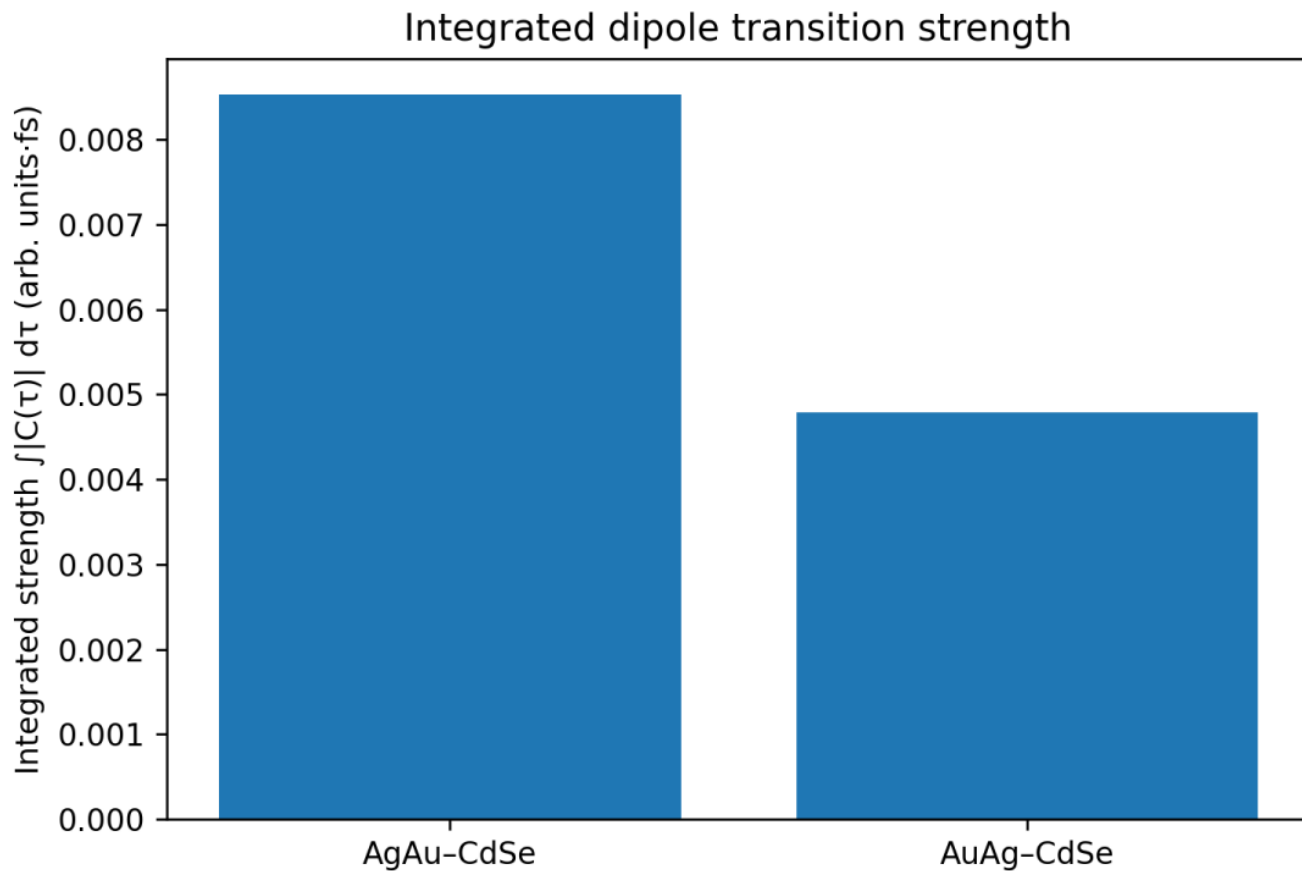

**Figure S1:** Integrated dipole transition intensity  $I = \int_0^T |C(\tau)| d\tau$  for AgAu-CdSe and AuAg-CdSe heterostructures, obtained from the time-dependent dipole response in RT-TDDFT simulations.

## Charge Density Difference

AgAu-CdSe

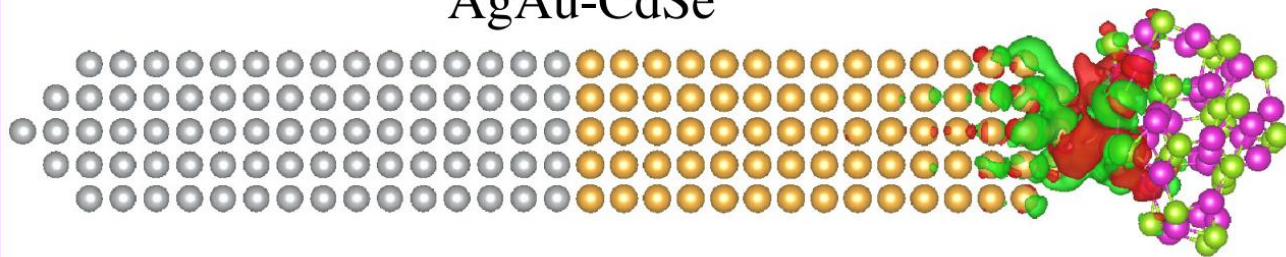

AuAg-CdSe

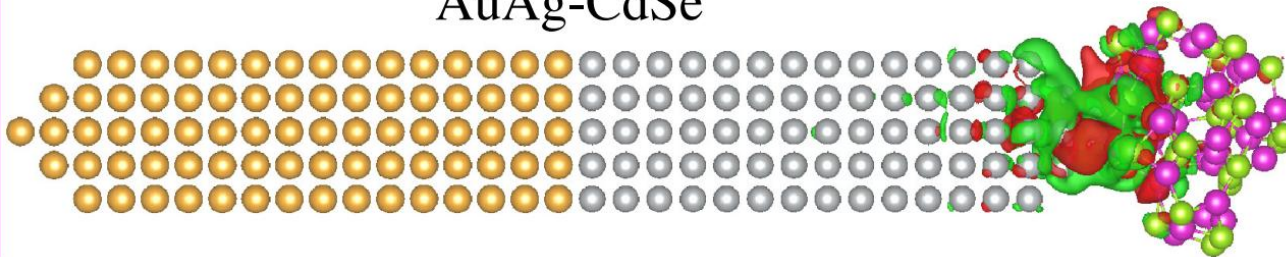

**Figure S2:** Charge–density–difference isosurfaces at the metal--QD junction (same iso-value in all panels). Green: accumulation; red: depletion.
